# Supplementary material
Source: PubMed Central journal article supplement (PMC6349364)

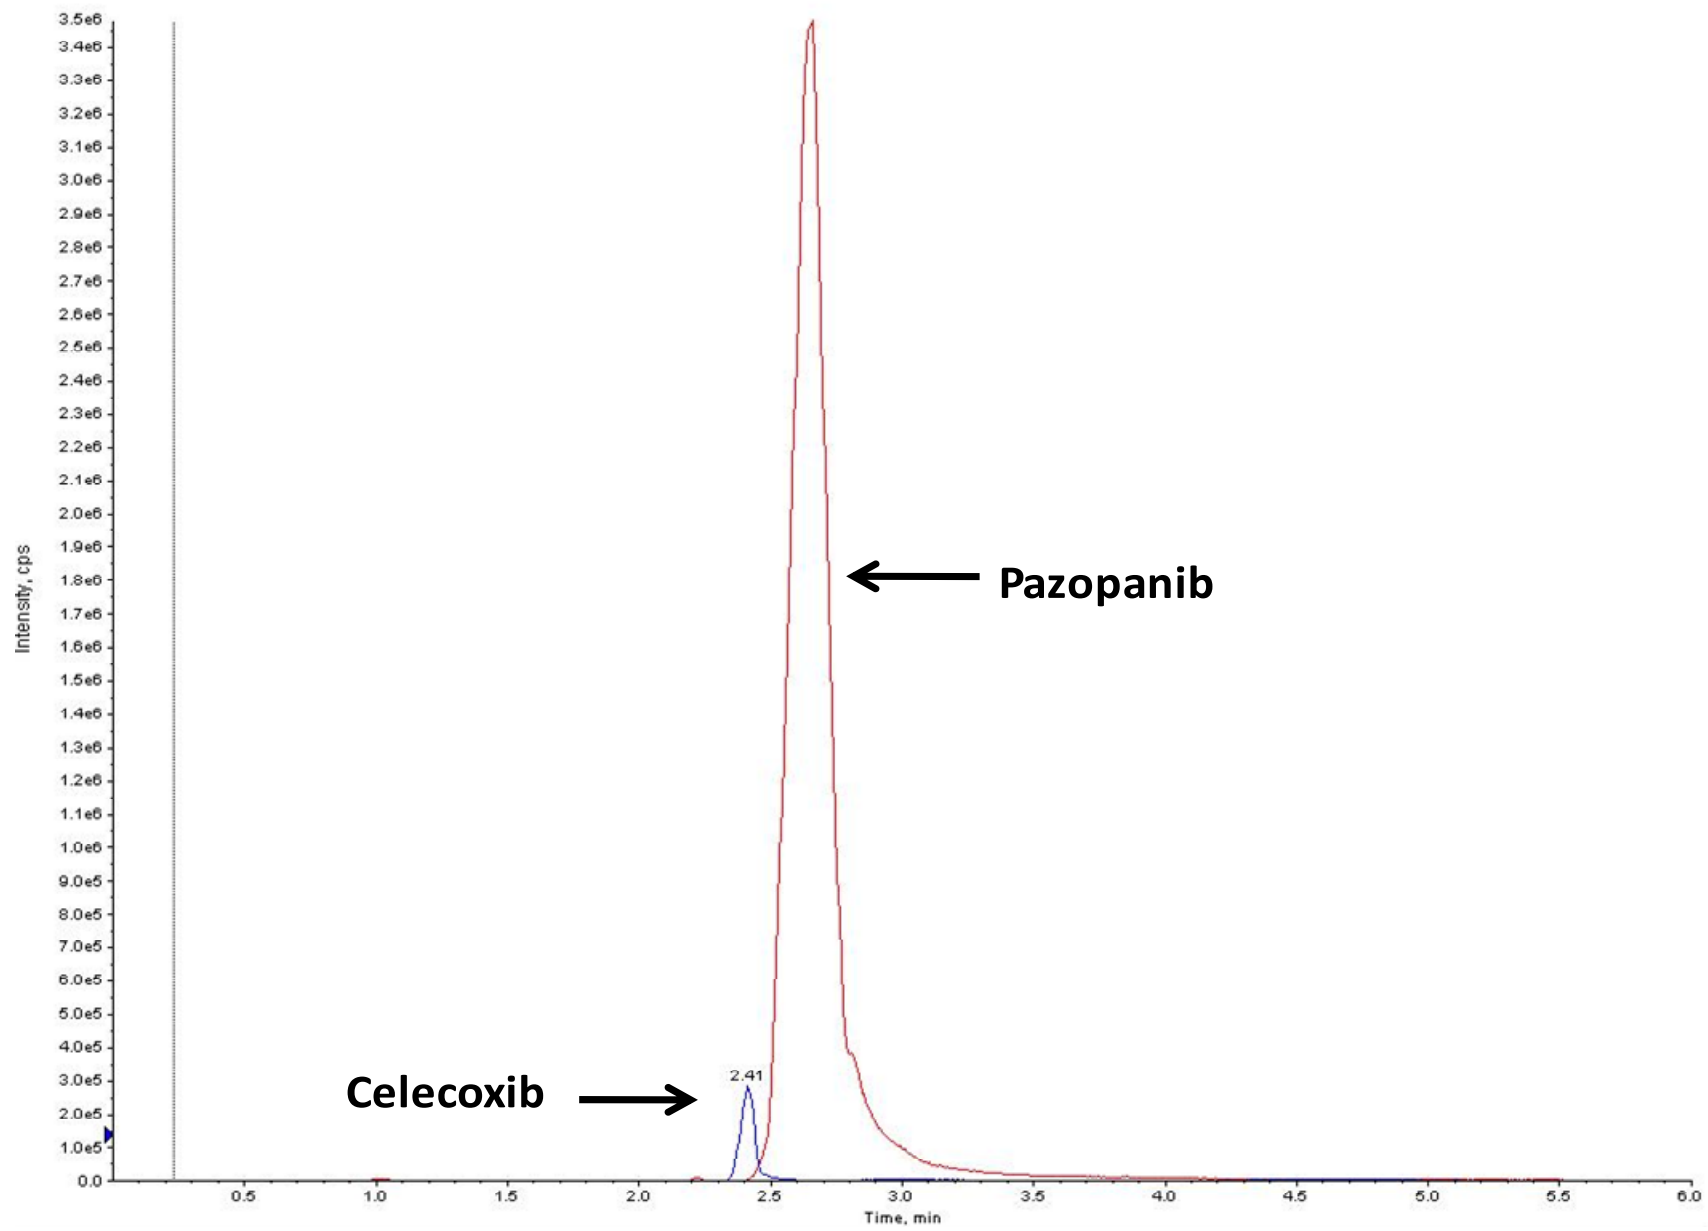

Supplement: NIHMS527445-supplement-02.pdf [file NIHMS527445-supplement-02.pdf]
